# Supplementary material
Source: PubMed Central journal article supplement (PMC5794652)

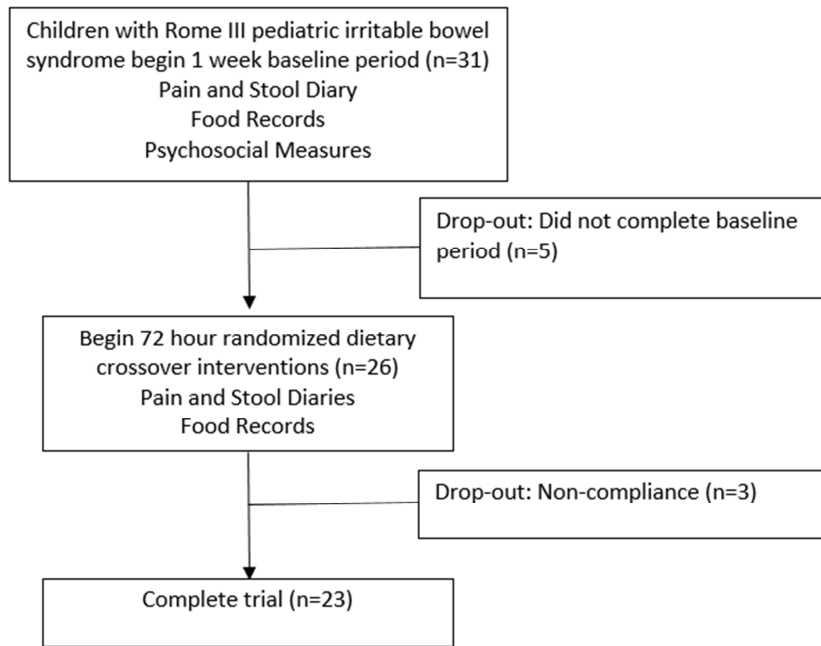

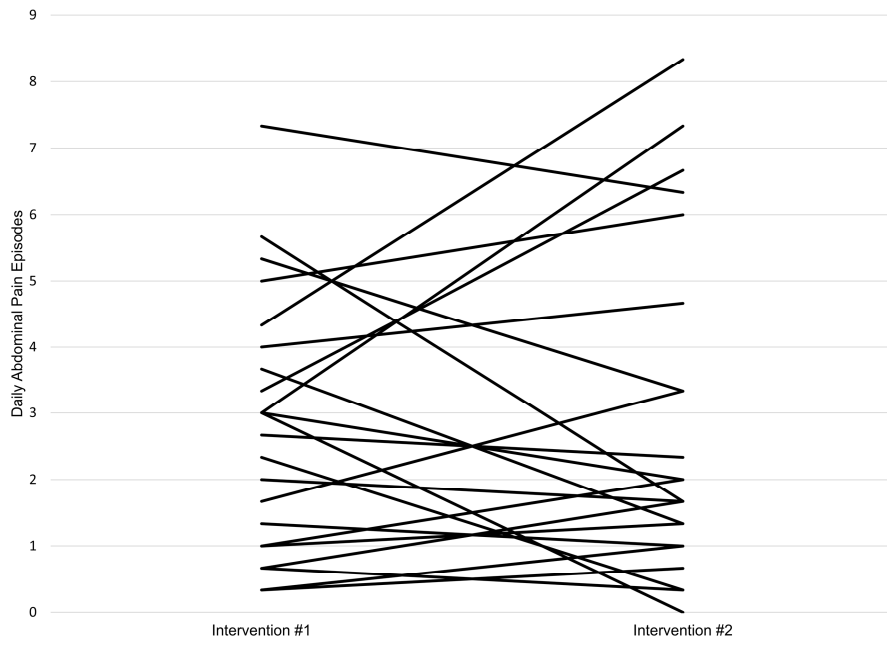

Supplement: NIHMS909904-supplement-supplement_1.pdf [file NIHMS909904-supplement-supplement_1.pdf]
